# Supplementary material
Source: PubMed Central journal article supplement (PMC3958040)
Supplement: MCB.01106-13_zmb999100348so1.pdf [file MCB.01106-13_zmb999100348so1.pdf]

| <b>Gene</b> | <b>Forward Primer</b>  | <b>Reverse Primer</b>  |
|-------------|------------------------|------------------------|
| STRA6       | TGAGGATTGAGGCCAGCCAGTC | TCCGGAAGGCCTGTAGGCTTG  |
| Cyclophilin | GCATACAGGTCCTGGCATCT   | TTCACCTTCCCAAAGACCAC   |
| TBP         | CCCTATCACTCCTGCCACAC   | ACGAAGTGCAATGGTCTTTAGG |
| 18S         | TTGACTCAACACGGGAAACC   | AGACAAATCGCTCCACCAAC   |
| RAR $\beta$ | AAGTGGGCATGTCCAAAGAG   | CAGAGGCCCAAGTCCAATC    |
| CYP26A1     | CTCTCCAACCTGCACGATTC   | AGCCACTGCTCCAGACAACT   |
| LRAT        | TGGAACAACCTGCGAACACTT  | TAATCCCAAGACAGCCGAAG   |
| SOCS3       | GTCACCCACAGCAAGTTTCC   | TCCAGTAGAATCCGCTCTCC   |

Supplemental Table 1: Primer sequences for qPCR
